# Supplementary material
Source: HighWire-hosted journal article supplement (https://bmjopen.bmj.com/content/12/3/e046403)
Supplement: inline-supplementary-material-1 [file inline-supplementary-material-1.pdf]

## Supplementary Appendix 1

Agreements between visual analog scales and job content questionnaire of Karasek and differences in outcomes according to cut-offs for the two dimensions of the job-demand-control model of Karasek. Mean±SD: Mean±Standard deviation

| Variables                           | Demand              |             |                |             | Control             |             |                |             |
|-------------------------------------|---------------------|-------------|----------------|-------------|---------------------|-------------|----------------|-------------|
|                                     | Visual analog scale |             | JCQ of Karasek |             | Visual analog scale |             | JCQ of Karasek |             |
|                                     | <75                 | ≥75         | <21            | ≥21         | <75                 | ≥75         | <70            | ≥70         |
| <b>Age</b>                          |                     |             |                |             |                     |             |                |             |
| Mean±SD                             | 41.5 ± 12.8         | 42.3 ± 10.8 | 42.5 ± 14.6    | 41.7 ± 10.2 | 41.05±11.4          | 42.2 ± 11.9 | 41.3 ± 12.5    | 42.1 ± 11.6 |
| P-value                             | 0.66                |             | 0.71           |             | 0.60                |             | 0.72           |             |
| Agreement                           | Yes                 |             |                |             | Yes                 |             |                |             |
| <b>Sex</b>                          |                     |             |                |             |                     |             |                |             |
| Women, n (%)                        | 38 (43.2%)          | 50 (56.8%)  | 27 (30.7%)     | 61 (69.3%)  | 22 (25%)            | 66 (75%)    | 22 (25%)       | 66 (75%)    |
| Men, n (%)                          | 36 (48.7%)          | 38 (51.3%)  | 25 (33.8%)     | 49 (66.2%)  | 20 (27%)            | 54 (73%)    | 15 (20.3%)     | 59 (79.7%)  |
| P-value                             | 0.49                |             | 0.67           |             | 0.77                |             | 0.48           |             |
| Agreement                           | Yes                 |             |                |             | Yes                 |             |                |             |
| <b>Marital status</b>               |                     |             |                |             |                     |             |                |             |
| Married / De facto, n (%)           | 53 (41.1%)          | 75 (58.6%)  | 39 (30.5%)     | 89 (69.5%)  | 36 (28.1%)          | 92 (71.9%)  | 27 (21.1%)     | 101 (78.9%) |
| Single / Widow, n (%)               | 21 (61.8%)          | 13 (38.2%)  | 13 (38.2%)     | 21 (61.8%)  | 6 (17.7%)           | 28 (82.3%)  | 10 (29.4%)     | 24 (70.6%)  |
| P-value                             | <b>0.03</b>         |             | 0.39           |             | 0.22                |             | 0.30           |             |
| Agreement                           | Moderate            |             |                |             | Yes                 |             |                |             |
| <b>Education</b>                    |                     |             |                |             |                     |             |                |             |
| Bachelor degree or less             | 5 (62.5%)           | 3 (37.5%)   | 4 (50%)        | 4 (50%)     | 5 (62.5%)           | 3 (37.5%)   | 4 (50%)        | 4 (50%)     |
| Undergraduate                       | 7 (53.9%)           | 6 (16.1%)   | 6 (46.2%)      | 7 (53.8%)   | 6 (46.2%)           | 7 (53.8%)   | 6 (46.2%)      | 7 (53.8%)   |
| Master's degree                     | 62 (44%)            | 79 (56%)    | 42 (29.8%)     | 99 (70.2%)  | 31 (22%)            | 110 (78%)   | 27 (16.2%)     | 114 (80.8%) |
| P-value                             | 0.49                |             | 0.25           |             | <b>0.009</b>        |             | <b>0.015</b>   |             |
| Agreement                           | Yes                 |             |                |             | Yes                 |             |                |             |
| <b>Seniority within the company</b> |                     |             |                |             |                     |             |                |             |
| Mean±SD                             | 10.7±10.9           | 11.1±10.6   | 11.7±13.2      | 10.6±9.4    | 7.8±9.0             | 12.1±11.0   | 8.6±9.5        | 11.7±11.0   |
| P-value                             | 0.68                |             | 0.56           |             | <b>0.02</b>         |             | 0.09           |             |
| Agreement                           | Yes                 |             |                |             | Moderate            |             |                |             |
| <b>Occupation</b>                   |                     |             |                |             |                     |             |                |             |
| Senior executives, n (%)            | 37 (46.3%)          | 43 (53.7%)  | 30 (37.5%)     | 50 (62.5%)  | 27 (33.8%)          | 53 (66.2%)  | 30 (37.5%)     | 50 (62.5%)  |
| Other, n (%)                        | 46 (41.8%)          | 64 (58.2%)  | 31 (28.2%)     | 79 (71.8%)  | 25 (22.7%)          | 85 (77.6%)  | 18 (16.4%)     | 92 (83.6%)  |
| P-value                             | 0.54                |             | 0.17           |             | 0.09                |             | <b>0.001</b>   |             |
| Agreement                           | Yes                 |             |                |             | Moderate            |             |                |             |

Agreements between visual analog scales and job content questionnaire of Karasek and differences in outcomes according to quadrants (active, passive, tense, relaxed). Mean±SD: Mean±Standard deviation

| Variables                           | VAS Quadrants |             |             |             | Karasek Quadrants |             |              |             |
|-------------------------------------|---------------|-------------|-------------|-------------|-------------------|-------------|--------------|-------------|
|                                     | Active        | Passive     | Tense       | Relaxed     | Active            | Passive     | Tense        | Relaxed     |
| <b>Age</b>                          |               |             |             |             |                   |             |              |             |
| Mean±SD                             | 42.7 ± 10.9   | 41 ± 12.2   | 41.1 ± 10.8 | 41.7 ± 13.2 | 42.1 ± 10         | 43.1 ± 14.7 | 40.1 ± 10.9  | 42.2 ± 14.8 |
| P-value                             | 0.88          |             |             |             |                   |             | 0.91         |             |
| Agreement                           | Yes           |             |             |             |                   |             |              |             |
| <b>Sex</b>                          |               |             |             |             |                   |             |              |             |
| Women, n (%)                        | 40 (45.4%)    | 12 (13.6%)  | 10 (11.4%)  | 26 (29.6%)  | 48 (54.6%)        | 9 (10.2%)   | 13 (14.8%)   | 18 (20.4%)  |
| Men, n (%)                          | 28 (37.8%)    | 10 (13.5%)  | 10 (13.5%)  | 26 (35.1%)  | 40 (54.1%)        | 6 (8.1%)    | 9 (12.2%)    | 19 (25.7%)  |
| P-value                             | 0.78          |             |             |             |                   |             | 0.83         |             |
| Agreement                           | Yes           |             |             |             |                   |             |              |             |
| <b>Marital status</b>               |               |             |             |             |                   |             |              |             |
| Married / De facto, n (%)           | 58 (45.3%)    | 19 (14.8%)  | 17 (13.3%)  | 34 (26.6%)  | 74 (57.8%)        | 12 (9.38%)  | 15 (11.7%)   | 27 (21.1%)  |
| Single / Widow, n (%)               | 10 (29.4%)    | 3 (13.6%)   | 3 (8.8%)    | 18 (52.9%)  | 14 (41.2%)        | 3 (8.82%)   | 7 (20.6%)    | 10 (29.4%)  |
| P-value                             | <b>0.04</b>   |             |             |             |                   |             | 0.29         |             |
| Agreement                           | Moderate      |             |             |             |                   |             |              |             |
| <b>Education</b>                    |               |             |             |             |                   |             |              |             |
| Bachelor degree or less             | 1 (12.5%)     | 3 (37.5%)   | 2 (25%)     | 2 (25%)     | 3 (37.5%)         | 3 (37.5%)   | 1 (12.5%)    | 1 (12.5%)   |
| Undergraduate                       | 3 (23.1%)     | 3 (23.1%)   | 3 (23.1%)   | 4 (30.8%)   | 5 (38.5%)         | 4 (30.8%)   | 2 (15.4%)    | 2 (15.4%)   |
| Master's degree                     | 64 (45.4%)    | 16 (13.6%)  | 15 (10.6%)  | 46 (32.6%)  | 80 (56.7%)        | 8 (5.7%)    | 19 (13.5%)   | 34 (24.1%)  |
| P-value                             | 0.10          |             |             |             |                   |             | <b>0.008</b> |             |
| Agreement                           | Moderate      |             |             |             |                   |             |              |             |
| <b>Seniority within the company</b> |               |             |             |             |                   |             |              |             |
| Mean±SD                             | 11.8 ± 10.8   | 6.71 ± 8.68 | 8.95 ± 9.45 | 12.4 ± 11.4 | 11.4 ± 9.84       | 10.2 ± 12.8 | 7.55 ± 6.75  | 12.3 ± 13.5 |
| P-value                             | 0.10          |             |             |             |                   |             | 0.33         |             |
| Agreement                           | Yes           |             |             |             |                   |             |              |             |
| <b>Occupation</b>                   |               |             |             |             |                   |             |              |             |
| Senior executives, n (%)            | 50 (45.5%)    | 11 (10%)    | 14 (12.7%)  | 35 (31.8%)  | 67 (60.9%)        | 6 (5.5%)    | 12 (10.9%)   | 15 (22.7%)  |
| Other, n (%)                        | 31 (38.8%)    | 15 (18.8%)  | 12 (15%)    | 22 (27.5%)  | 34 (42.5%)        | 14 (17.5%)  | 16 (20%)     | 16 (20%)    |
| P-value                             | 0.31          |             |             |             |                   |             | <b>0.007</b> |             |
| Agreement                           | Moderate      |             |             |             |                   |             |              |             |
